# Supplementary material for: Retrospective cohort analysis of Spanish national trends of coronary artery bypass grafting and percutaneous coronary intervention from 1998 to 2017
Source: PubMed Central journal article supplement — BMJ Open. 2021 Apr 7;11(4):e046141. doi: 10.1136/bmjopen-2020-046141 (PMC8031703; doi:10.1136/bmjopen-2020-046141), 2021-04-07
Supplement: bmjopen-2020-046141supp001.pdf [file bmjopen-2020-046141supp001.pdf]

## Supplementary Material

**Table 1. ICD9 and ICD10 codes**

|                                 | ICD9                                                           | ICD10                                                                                                                                                                                                                                                                |
|---------------------------------|----------------------------------------------------------------|----------------------------------------------------------------------------------------------------------------------------------------------------------------------------------------------------------------------------------------------------------------------|
| CABG                            | 36.1x                                                          | 0210xxx,0211xxx,0212xxx,0213xxx                                                                                                                                                                                                                                      |
| PCI                             | 00.66, 36.03, 36.06, 36.07, 36.09                              | 0270xxx, 0271xxx,0272xxx,0273xxx, 02C0xxx, 02C1xxx, 02C2xxx, 02C3xxx, 02C4xxx                                                                                                                                                                                        |
| Excluded Concomitant procedures | 35.xx, 37.3x, 37.51, 38.44, 38.45, 39.1x, 39.2x, 39.3x & 37.90 | 027Fxxx, 027Gxxx, 02NFxxx, 02NGxxx, 02Vxxxx, 027Jxxx, 02NJxxx, 02Nxxxx, 02Rxxxx, 02Qxxxx, 028xxxx, 02Bxxxx, 02Cxxxx (different from 02C0xxx, 02C1xxx, 02C3xxx and 02C4xxx), 02Fxxxx, 02Hxxxx, 02Jxxxx, 02Kxxxx, 02Nxxxx, 02Pxxxx, 02Uxxxx, 02Wxxxx, 02Yxxxx, 025xxxx |
| STEMI                           | 410.x1                                                         | I21.x9, I21.x1, I21.x, I21.4, I21.3, I21.9                                                                                                                                                                                                                           |

CABG: coronary artery bypass grafting. PCI: percutaneous coronary intervention. AMI: acute myocardial infarction STEMI: ST elevation myocardial infarction

**Table 2. Excluded volume and main reasons for exclusion throughout the study period.**

|                                | 1997-2002       | 2003-2007       | 2008-2012        | 2013-2017        | Total            | PLT    |
|--------------------------------|-----------------|-----------------|------------------|------------------|------------------|--------|
| N                              | 123593          | 229843          | 304095           | 320266           | 977797           |        |
| Acute STEMI                    | 24316<br>(19.7) | 60527<br>(26.3) | 89136 (29.3)     | 99969 (31.2)     | 273948<br>(28)   | <0.001 |
| Coding *                       | 7048 (5.7)      | 16264 (7.1)     | 28490 (9.4)      | 36700 (11.5)     | 88502 (9.1)      | <0.001 |
| Concomitant procedures         | 6319 (5.1)      | 11559 (5)       | 12603 (4.1)      | 15173 (4.7)      | 45654 (4.7)      | <0.001 |
| PCI & CABG in the same episode | 447 (0.4)       | 580 (0.3)       | 777 (0.3)        | 781 (0.2)        | 2585 (0.3)       | <0.001 |
| Age <18 or >100                | 179 (0.1)       | 193 (0.1)       | 236 (0.1)        | 175 (0.1)        | 783 (0.1)        | <0.001 |
| Exclusion                      | 36012<br>(29.1) | 83012<br>(36.1) | 119665<br>(39.4) | 135132<br>(42.2) | 373821<br>(38.2) | <0.001 |

PCI: Percutaneous coronary intervention. CABG: Coronary artery bypass grafting. LT: Linear trend. \* Including coding errors, consolidated episodes, staged procedures..

**Figure 1. Changes in the volume of excluded episodes.**

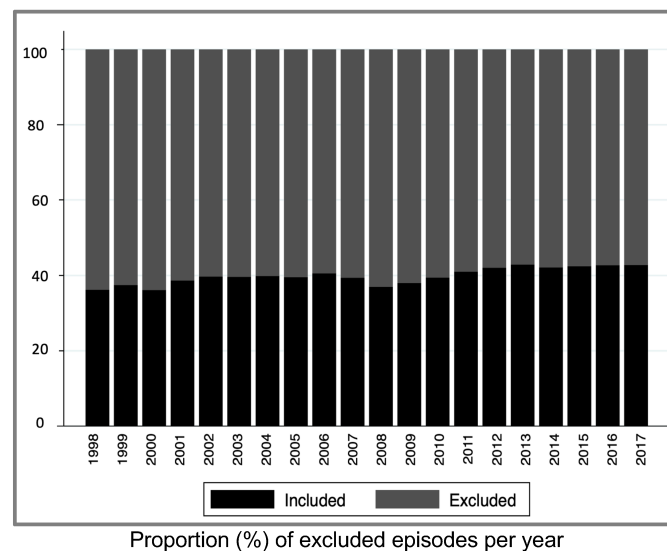

Figure 2. Absolute number of procedures per year.

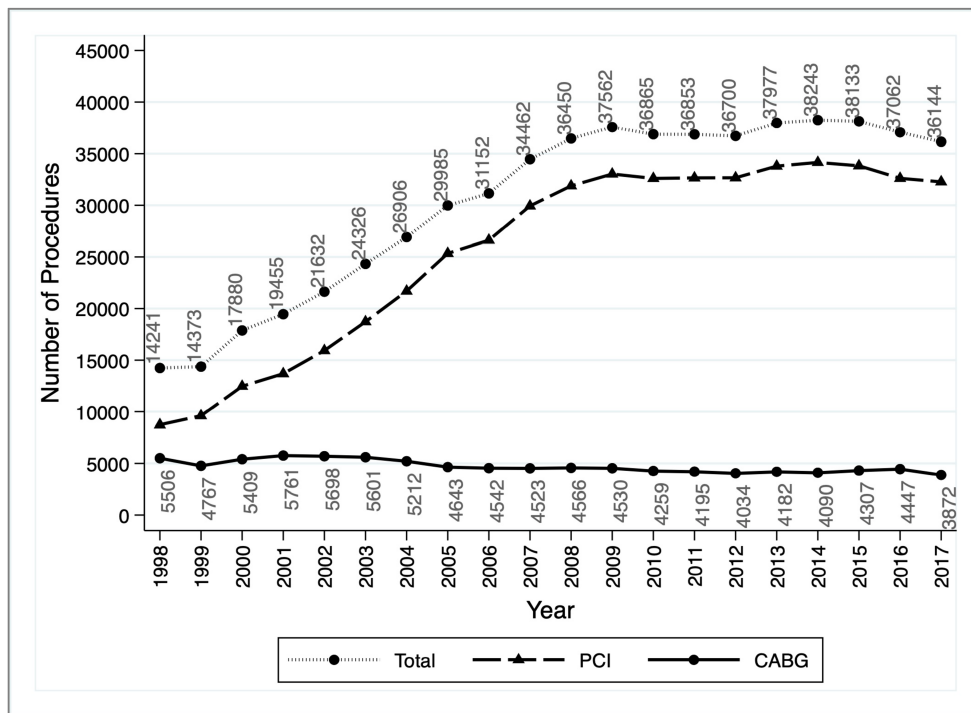

Figure 3. Absolute number of procedures depending on coronary syndrome.

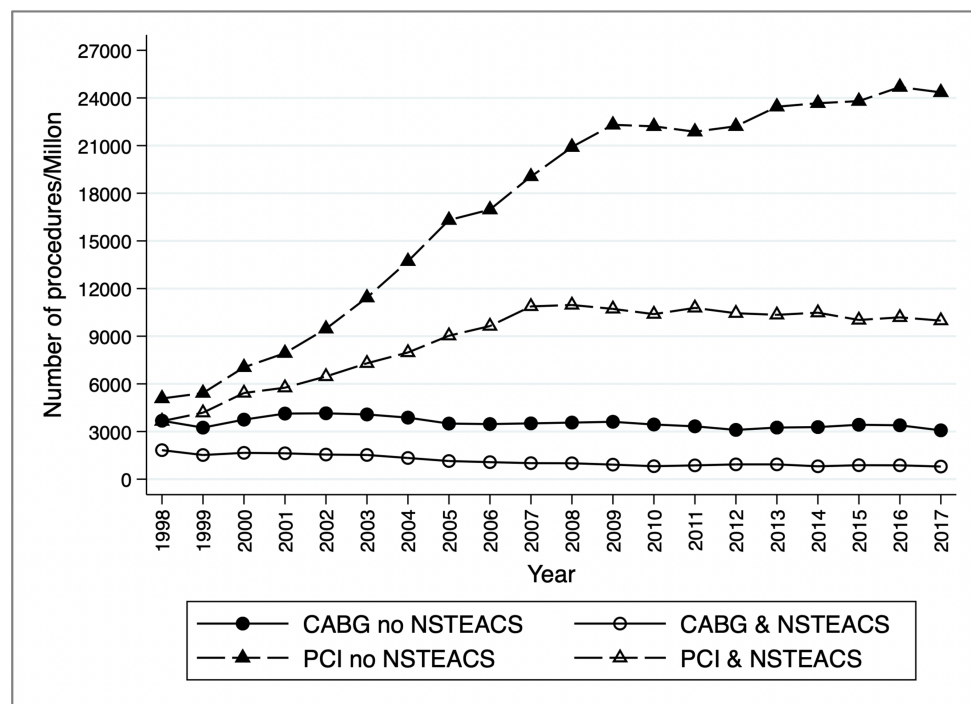

It is observed that the proportion of CABG performed in patients with NSTEMI/ACS remained stable throughout the study period. However, there was a more marked increase in the number of PCI procedures in patients without NSTEMI/ACS. NSTEMI/ACS: non-ST elevation acute coronary syndrome.

Figure 4. Mean modified Charlson's Index.

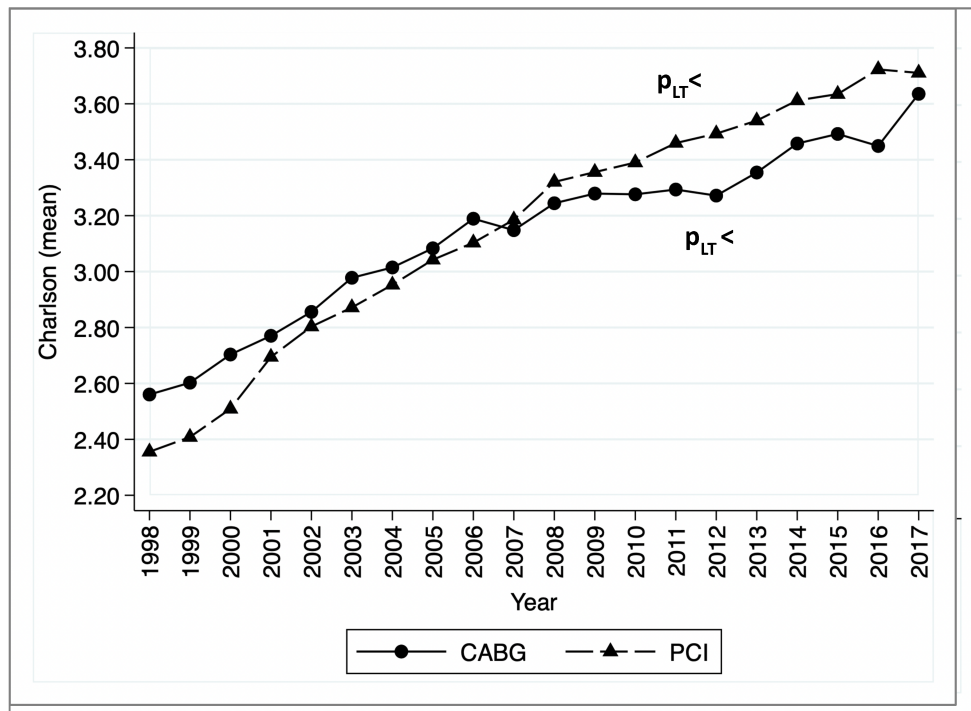

Figure 5. Previous revascularization

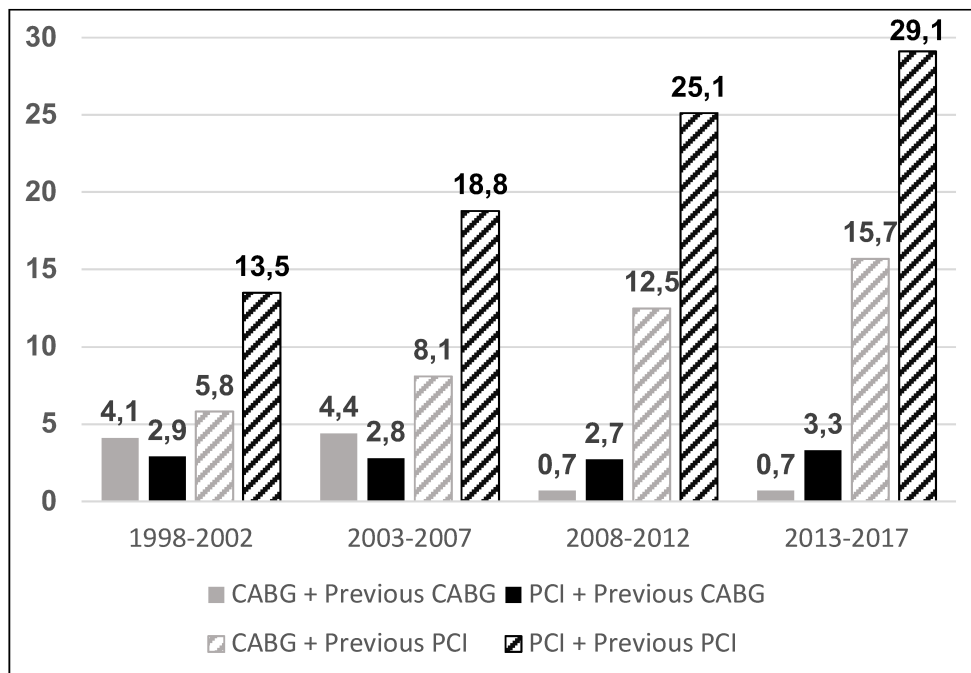

Proportion of CABG or PCI patients with previous coronary surgery or percutaneous coronary intervention. The proportion of CABG with previous CABG significantly decreased (4.1% Vs 0.7%,  $p_{LT} < 0.001$ ). Proportion of PCI with previous CABG increased from 2.9% to 3.3% ( $p_{LT} < 0.001$ ). Proportion of CABG patients with previous PCI increased from 5.8% to 15.7% ( $p_{LT} < 0.001$ ). Proportion of PCI patients with previous PCI increased from 13.5% to 29.1% ( $p_{LT} < 0.001$ ).

|                                 | CABG        |             |             |             |                   | PCI          |              |              |               |                   | TOTAL       |                      |        |
|---------------------------------|-------------|-------------|-------------|-------------|-------------------|--------------|--------------|--------------|---------------|-------------------|-------------|----------------------|--------|
|                                 | 1998-2002   | 2003-2007   | 2008-2012   | 2013-2017   | p <sub>(TL)</sub> | 1998-2002    | 2003-2007    | 2008-2012    | 2013-2017     | p <sub>(TL)</sub> | CABG        | PCI                  | p      |
| n(%) <sup>a</sup>               | 7494 (36.3) | 8799 (18.9) | 8509 (13.4) | 8805 (13.3) | <0.001            | 13131 (63.7) | 37878 (81.2) | 55246 (86.7) | 57518 (86.7)  | <0.001            | 33607 (17)  | 163773 (83)          | <0.001 |
| Revascularization<br>3+ vessels | 2118(32.7)  | 2182(28.4)  | 2043(27.4)  | 1835(22.9)  | <0.001            | -            | -            | 4853 (8.9)   | 4876 (8.5)    | <0.001            | 8178 (27.6) | 9729/112764<br>(8.6) | <0.001 |
| Number of stents                |             |             |             |             |                   |              |              |              |               |                   |             |                      |        |
| <3                              |             |             |             |             |                   |              |              | 44791 (81.1) | 51306 (91.2)  | <0.001            |             | 96097/112764 (85.2)  | <0.001 |
| ≥3                              |             |             |             |             |                   |              |              | 10455 (18.9) | 6212 (10.8)   | <0.001            |             | 16667/112764(14.8)   | <0.001 |
| BMS                             |             |             |             |             |                   | 60440 (99.5) | 91514 (74.8) | 67011 (41.2) | 34085 (20.7)  | <0.001            |             | 252715(20.7)         | <0.001 |
| DES                             |             |             |             |             |                   |              | 34868 (28.5) | 89196 (54.8) | 115652 (70.2) | <0.001            |             | 239716 (47)          | <0.001 |
| Bilateral ITA                   | 519 (6.9)   | 1037 (11.8) | 1175 (13.8) | 1844 (20.9) | <0.001            | -            | -            | -            | -             | -                 | 4575 (13.6) | -                    | -      |
| Off Pump CABG                   | 8496(31.3)  | 8708(35.5)  | 7178(33.3)  | 6984(34.2)  | <0.001            | -            | -            | -            | -             | -                 | 31365(33.5) | -                    | -      |

**Table 3. Procedural characteristics of PCI (percutaneous coronary intervention) or CABG (Coronary artery bypass grafting) among patients with diabetes.** Data is expressed with n(%). p<sub>(TL)</sub> contrast test for linear trend. \*No contrast for linear trend. a. Number of CABG or PCI divided by the volume of revascularizations in diabetic patients. BMS: bare metal stent, DES: drug eluting stent ITA: internal thoracic artery.

**Table 4. Variables included in the model to detect factor associated to in-hospital mortality after CABG and PCI.**

|           | <b>Model to detect factors associated for in hospital mortality after CABG</b>                                                                                                                                                                | <b>Model to detect factors associated for in hospital mortality after PCI</b>                                                                                                                                                               |
|-----------|-----------------------------------------------------------------------------------------------------------------------------------------------------------------------------------------------------------------------------------------------|---------------------------------------------------------------------------------------------------------------------------------------------------------------------------------------------------------------------------------------------|
| Variables | Spanish region, Groups of hospitals according to the volume of CABG/year-center, COPD, Age ranges, Sex, Previous MI, NSTEMI on admission, PVD, CVD, Diabetes, CKD, Previous CABG, Previous PCI, Off-Pump, CHF, bilateral ITA, Period of study | CABG on site, Spanish region, Groups of hospitals according to the volume of PCI/year-center, COPD, Age ranges, Sex, Previous MI, NSTEMI on admission, PVD, CVD, Diabetes, CKD, Previous CABG, Previous PCI, BMS, DES, CHF, Period of study |
| AUC       | 0.76 (95%CI 0.76;0.77)                                                                                                                                                                                                                        | 0.81 (95%CI 0.81;0.82)                                                                                                                                                                                                                      |

CABG: coronary artery bypass grafting. PCI: percutaneous coronary intervention. COPD: chronic obstructive pulmonary disease. MI: myocardial infarction. NSTEMI: non-ST elevation acute coronary syndrome. PVD: peripheral vascular disease. CHF: congestive heart failure. CVD: cerebrovascular disease. CKD: chronic kidney disease. ITA: Internal thoracic artery. BMS: implantation of bare metal stent. DES: Implantation of drug eluting stent. AUC Area Under the Curve.

**Table 5. Variables included in the model to estimate expected in-hospital mortality after CABG and PCI.**

|           | <b>Model to detect factors associated for in hospital mortality after CABG</b>                                                                                                                                                                    | <b>Model to detect factors associated for in hospital mortality after PCI</b>                                                                                                                                                                    |
|-----------|---------------------------------------------------------------------------------------------------------------------------------------------------------------------------------------------------------------------------------------------------|--------------------------------------------------------------------------------------------------------------------------------------------------------------------------------------------------------------------------------------------------|
| Variables | Spanish region, Groups of hospitals according to the volume of CABG/year-center, COPD, Age ranges, Sex, Previous MI, NSTEMI on admission, PVD, CVD, Diabetes, CKD, Previous CABG, Previous PCI, Off-Pump, CHF, bilateral ITA, High blood pressure | CABG on site, Spanish region, Groups of hospitals according to the volume of PCI/year-center, COPD, Age ranges, Sex, Previous MI, NSTEMI on admission, PVD, CVD, Diabetes, CKD, Previous CABG, Previous PCI, BMS, DES, CHF, high blood pressure. |
| AUC       | 0.74 (95%CI 0.73;0.75)                                                                                                                                                                                                                            | 0.81 (95%CI 0.81;0.82)                                                                                                                                                                                                                           |

CABG: coronary artery bypass grafting. PCI: percutaneous coronary intervention. COPD: chronic obstructive pulmonary disease. MI: myocardial infarction. NSTEMI: non-ST elevation acute coronary syndrome. PVD: peripheral vascular disease. CHF: congestive heart failure. CVD: cerebrovascular disease. CKD: chronic kidney disease. ITA: Internal thoracic artery. BMS: implantation of bare metal stent. DES: Implantation of drug eluting stent. AUC Area Under the Curve.

**Figure 6. Median Number of Procedures/Hospital- year and Number of Hospitals reporting data to MBDS.**

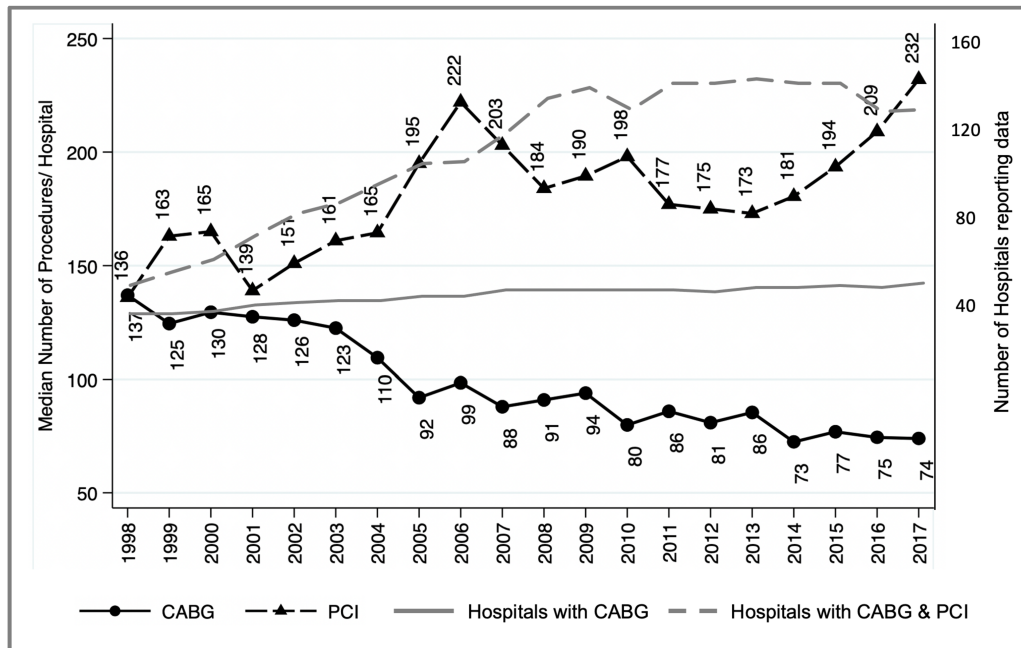

Left axis: median procedures/hospital. Right axis: number of hospitals reporting data to MBDS

**Table 6. Number of hospitals and volume of procedures/hospital in each study period**

|                                                      | 1998-2002      | 2003-2007      | 2008-2012       | 2013-2017       | p(LT)  |
|------------------------------------------------------|----------------|----------------|-----------------|-----------------|--------|
| Median number of hospitals/year                      |                |                |                 |                 |        |
| (+)CABG(+)PCI                                        | 37(36;40)      | 44(42;44)      | 47(47;47)       | 48(45;50)       | <0.001 |
| (-)CABG(+)PCI                                        | 25(19;32)      | 61(54;62)      | 93(88;95)       | 96(77;99)       | <0.001 |
| Median number of procedures/center-year              |                |                |                 |                 |        |
| CABG                                                 | 130.5(102;163) | 103(73;145)    | 89(58;120)      | 75.5(50.5;114)  | <0.001 |
| PCI                                                  | 148(58;249)    | 195(77;334)    | 186(71;340)     | 198(80.5;350.5) | <0.001 |
| Mortality according to hospital volume of procedures |                |                |                 |                 |        |
| Hospital Volume of CABG                              |                |                |                 |                 |        |
| Low Volume                                           | 330/3866(8.5)  | 206/3053(6.8)  | 87/2406(3.6)    | 74/2079(3.6)    | <0.001 |
| Low-Intermediate                                     | 411/5511(7.5)  | 322/4671(6.9)  | 170/4272(4)     | 108/3901(2.8)   | <0.001 |
| Low-High                                             | 530/7149(7.4)  | 345/6984(4.9)  | 226/6446(3.5)   | 172/5694(3)     | <0.001 |
| High                                                 | 469/9156(5.1)  | 352/9524(3.7)  | 265/8376(3.2)   | 222/8708(2.6)   | <0.001 |
| Hospital Volume of PCI                               |                |                |                 |                 |        |
| Low Volume                                           | 18/3259(0.6)   | 31/6004(0.5)   | 45/7613(0.6)    | 65/8052(0.8)    | 0.04   |
| Low-Intermediate                                     | 67/8160(0.8)   | 155/17226(0.9) | 204/21446(1)    | 264/23081(1.1)  | 0.003  |
| Low-High                                             | 172/15950(1.1) | 426/33545(1.3) | 682/45088(1.5)  | 758/47881(1.6)  | <0.001 |
| High                                                 | 296/30869(1)   | 745/61896(1.2) | 1225/84334(1.5) | 1140/80415(1.4) | <0.001 |

Table 3. Data are shown as n(%) or median and IQR. CABG: "Coronary Artery Bypass Grafting". PCI: "Percutaneous Coronary Intervention. (+)CABG(+)PCI: Hospitals with CABG and PCI; (-)CABG(+)PCI: Hospitals without CABG but with PCI.
